# Supplementary material for: The ROS/GRK2/HIF‐1α/NLRP3 Pathway Mediates Pyroptosis of Fibroblast‐Like Synoviocytes and the Regulation of Monomer Derivatives of Paeoniflorin
Source: Hindawi journal article supplement (doi:10.1155/2022/4566851), 2022-01-01
Supplement: f1 [file 4566851.f1.pdf]

**Extended Data Fig. 1 MDP can inhibit FLS pyrolysis induced by Co<sup>2+</sup> .**

(A, B) FLS were treated with Co<sup>2+</sup> for 24h and different doses of MDP for 16h. Immunoblot analysis and quantification of HIF-1 $\alpha$  and GSDMD-N. (C, D) FLS were treated with Co<sup>2+</sup> for 24h and MDP (10<sup>-6</sup> mol/L ) for 16h.

**Extended Data Fig. 2 After 2 hours of hypoxia, the levels of GRK2, HIF-1 $\alpha$  and ROS were significantly increased in FLS.**

(A, B) Immunoblot analysis and quantification of HIF-1 $\alpha$ , NLRP3, ASC, Caspase-1, and cleaved-Caspase-1. FLS was exposed to hypoxia for 0, 1, 2, 3, 4, 6, 24, 48h. Immunoblot analysis and quantification of GRK2, HIF-1 $\alpha$ . (C) The images of ROS fluorescent.

**Extended Data Fig. 3 MDP could inhibit the expression of GRK2 in FLS of AA rats and induce VHL production**

(A, B) Immunoblot analysis and quantification of HIF-1 $\alpha$  and GSDMD-N in the FLS of different groups of rats. Data were presented as mean  $\pm$  SD. n = 3. \*\*\*p < 0.001 compared with control group and ###p < 0.001 compared with AA group. (C, D) The expression level of VHL treated with or without MDP. Data were presented as mean  $\pm$  SD. n = 3. \*p < 0.05 compared with control group.

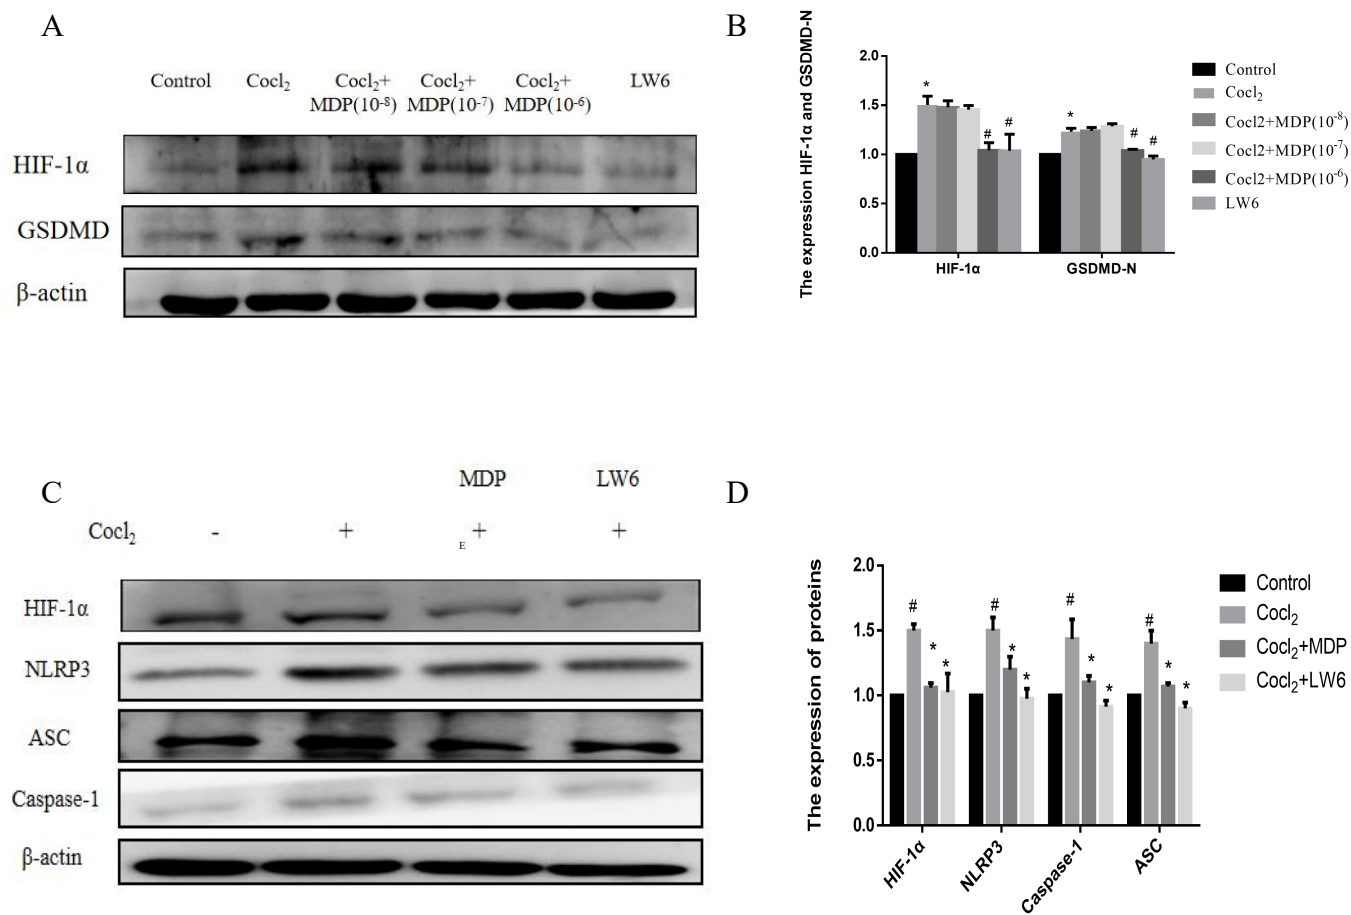

Extended Data Fig. 1

A

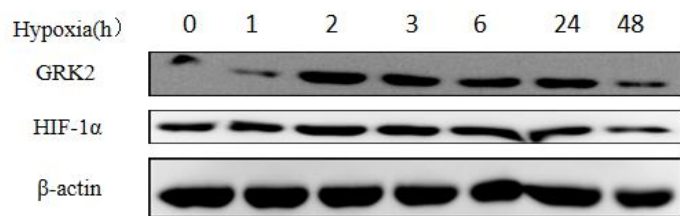

B

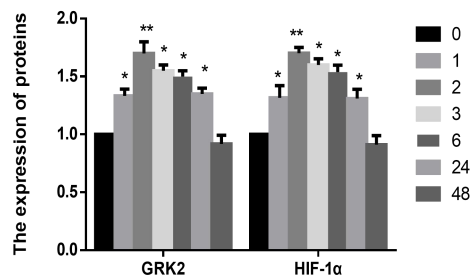

C

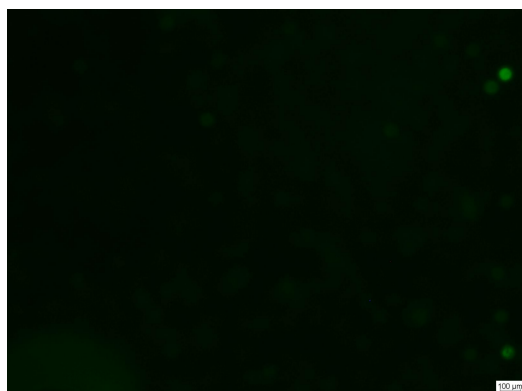

Control

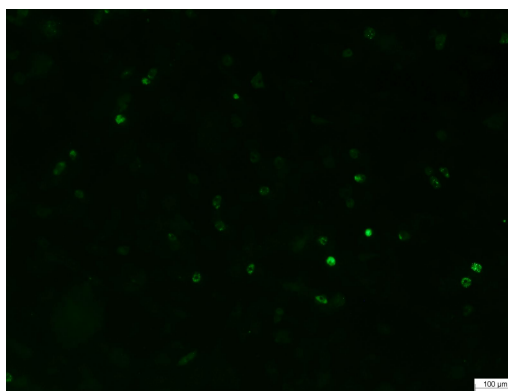

Hypoxia(2h)

Extended Data Fig. 2

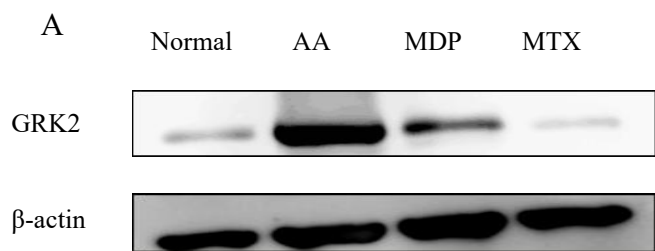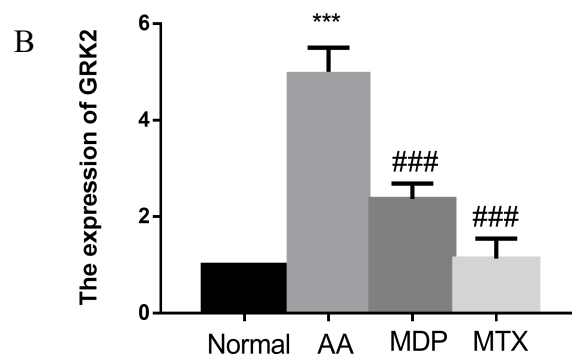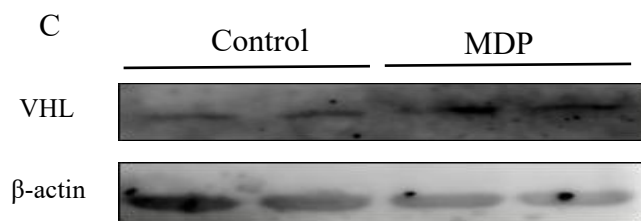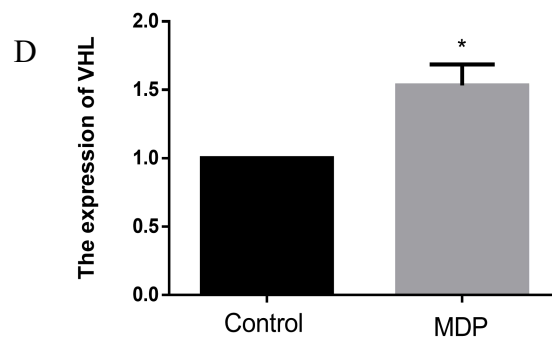

Extended Data Fig. 3
